# Supplementary material for: Facile preparation of a highly efficient NiZn2O4–NiO nanoflower composite grown on Ni foam as an advanced battery-type electrode material for high-performance electrochemical supercapacitors
Source: Royal Society of Chemistry journal article supplement (doi:10.1039/d0dt00268b), 2020-01-01
Supplement: d0dt00268b1.pdf [file d0dt00268b1.pdf]

**Electronic Supplementary Information**

**Facile preparation of highly efficient NiZn<sub>2</sub>O<sub>4</sub>-NiO nanoflower composite grown on Ni foam as advanced battery-type electrode material for high-performance electrochemical supercapacitors†**

**Yedluri Anil Kumar<sup>a</sup>, Kulurumotlakatla Dasha Kumar<sup>a</sup> and Hee-Je Kim<sup>a\*</sup>**

<sup>a</sup>School of Electrical Engineering, Pusan National University, Busandaehak-ro 63beon-gil, Geumjeong-gu, Busan, 46241, Rep. of KOREA

**\*Corresponding Author**

E-mail: [heeje@pusan.ac.kr](mailto:heeje@pusan.ac.kr) (H.-J. Kim)

Tel: +82-10-2295-0613. Fax: +82 51 513 0212.

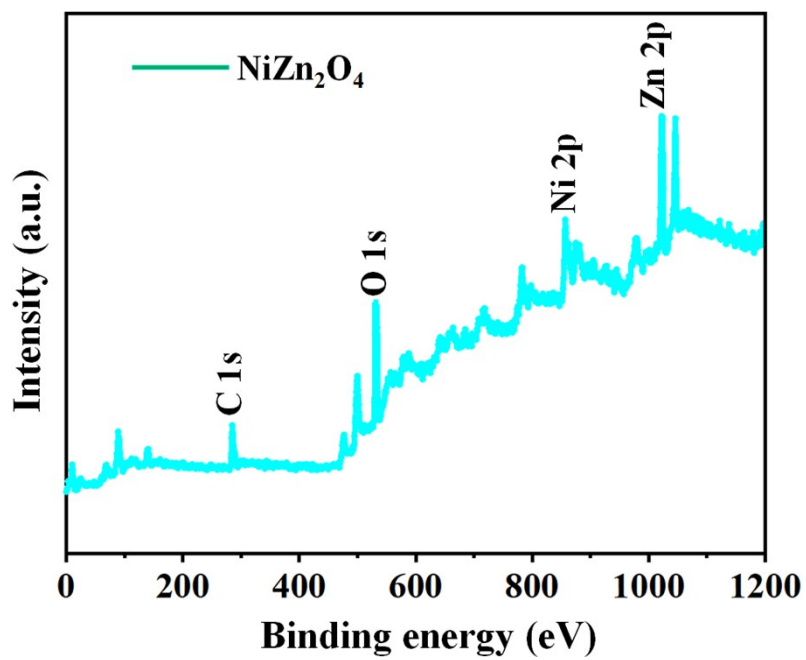

**Fig. S1** XPS survey spectrum of NiZn<sub>2</sub>O<sub>4</sub> NLAs electrode grown on Ni foam.

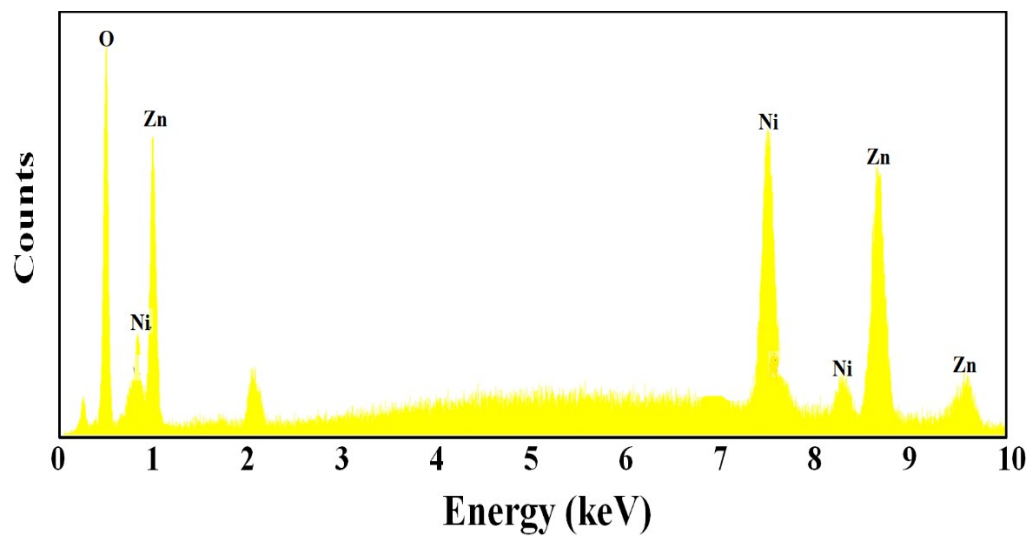

**Fig. S2** EDX survey spectrum of NiZn<sub>2</sub>O<sub>4</sub>-NiO NFAs composite electrode grown on Ni foam.

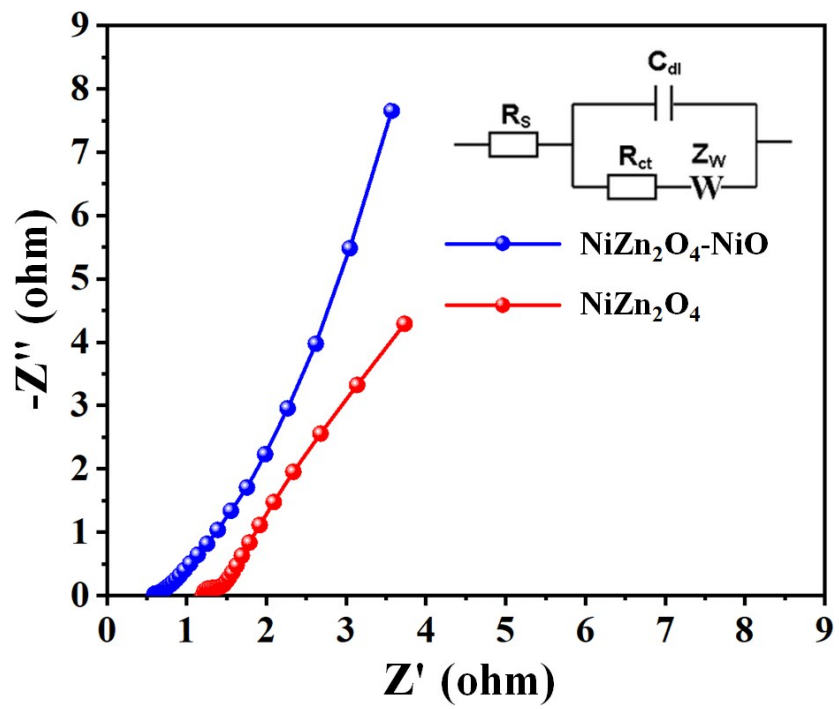

**Fig. S3** Nyquist plots of the battery-type NiZn<sub>2</sub>O<sub>4</sub> NLAs and NiZn<sub>2</sub>O<sub>4</sub>-NiO NFAs electrodes after 5000 long cycles.
